# Supplementary material for: Kar5p Is Required for Multiple Functions in Both Inner and Outer Nuclear Envelope Fusion in Saccharomyces cerevisiae
Source: PubMed Central journal article supplement (PMC4291462; doi:10.1534/g3.114.015800), 2014-12-02
Supplement: supp_g3.114.015800_015800SI.pdf [file supp_g3.114.015800_015800SI.pdf]

**Kar5p is required for multiple functions in both inner and outer nuclear envelope fusion  
in *Saccharomyces cerevisiae***

Jason V. Rogers\* and Mark D. Rose\*

Affiliations:

\* Department of Molecular Biology, Princeton University, Princeton, NJ 08544-1014

Corresponding Author:

Mark D. Rose

Lewis Thomas Lab, Room 319, Washington Road, Princeton, NJ, 08540

Phone: (609) 258-2804

E-mail: [mdrose@princeton.edu](mailto:mdrose@princeton.edu)

**DOI: 10.1534/g3.114.015800**

Fraction GFP-Prm3 at SPB vs. Total Cellular GFP-Prm3

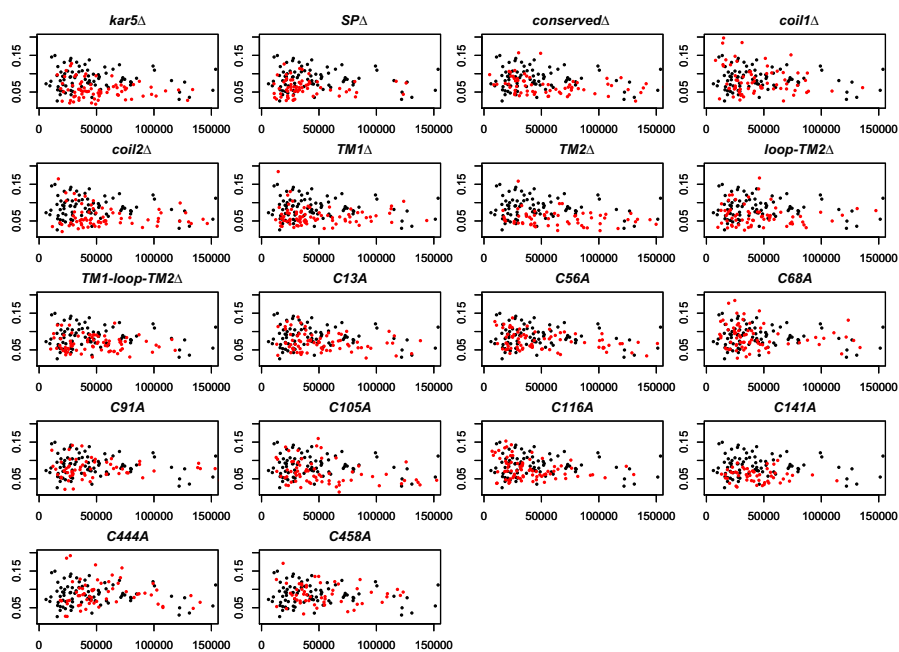

**Figure S1** Quantitative comparisons of GFP-Prm3 enrichment in *kar5* mutants. Each panel shows fraction GFP-Prm3 at the SPB (y-axis) vs. total cellular GFP (x-axis). Each point is a cell; black points are *KAR5*<sup>+</sup> (constant in each panel), and red points are the *kar5* mutant listed in the title for each panel. Data is identical to that summarized in Figure 2B. A few points lying beyond the axes are not shown for clarity.

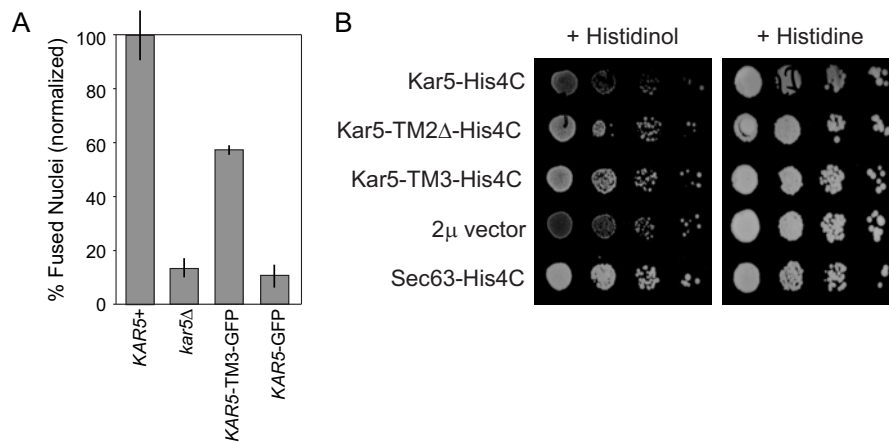

**Figure S2** Kar5-TM3-GFP is largely functional and faces outside of the ER lumen. (A) Nuclear fusion assay as in Figure 1D. Average of multiple independent experiments are shown (at least three trials for each). Error bars show  $\pm$ SEM. (B) His4C membrane topology assay. *his4-* cells (MY7261) containing the indicated plasmids were grown to saturation then diluted to 2.0 OD<sub>600</sub> and 10-fold serial dilutions were spotted on synthetic medium containing either histidinol or histidine. Histidinol solution was prepared from dissolving L-histidinol dihydrochloride (Sigma #H 6647) to a 5% w/v aqueous solution (230 mM), adjusted to pH 9 with 10 M NaOH. Plates were prepared by spreading 250  $\mu$ L of histidinol (50 mg/mL) or 100  $\mu$ L histidine (10 mg/mL) liquid stock onto plates lacking uracil and histidine and allowing to dry for 1 hour prior to spotting the cells. Minor background growth was apparent in all strains on the histidinol plates, possibly due to trace amounts of contaminating histidine in the histidinol preparation (described in Sengstag 2000). All plasmids were 2 $\mu$  and His4C fusions were expressed under the *ADH1* promoter.

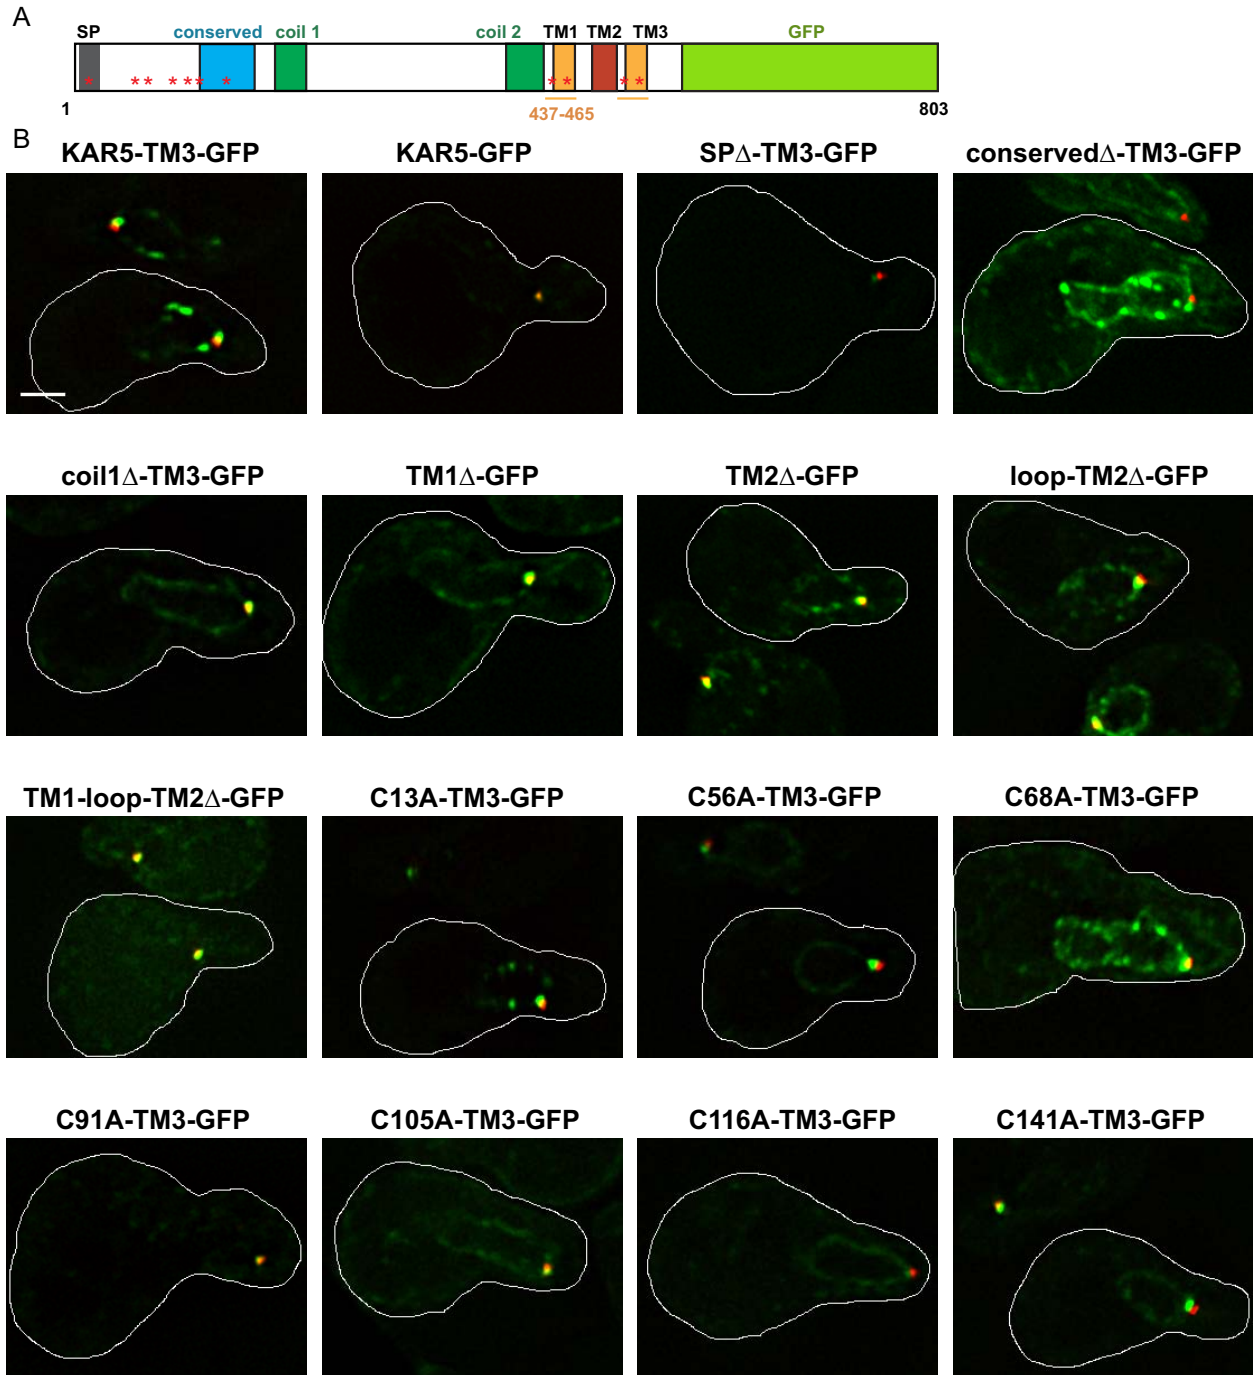

**Figure S3** Representative GFP images of *kar5* mutants from Figure 3. (A) Schematic of Kar5-TM3-GFP as in Figure 3A. (B) Representative images showing a merge of GFP, Spc42-mCherry, and a cell outline. As in Figure 3, strains used are MS8020 plus the indicated CEN plasmid. All images are the same size and scaled to the same brightness/contrast. Scale bar, 2  $\mu$ m.

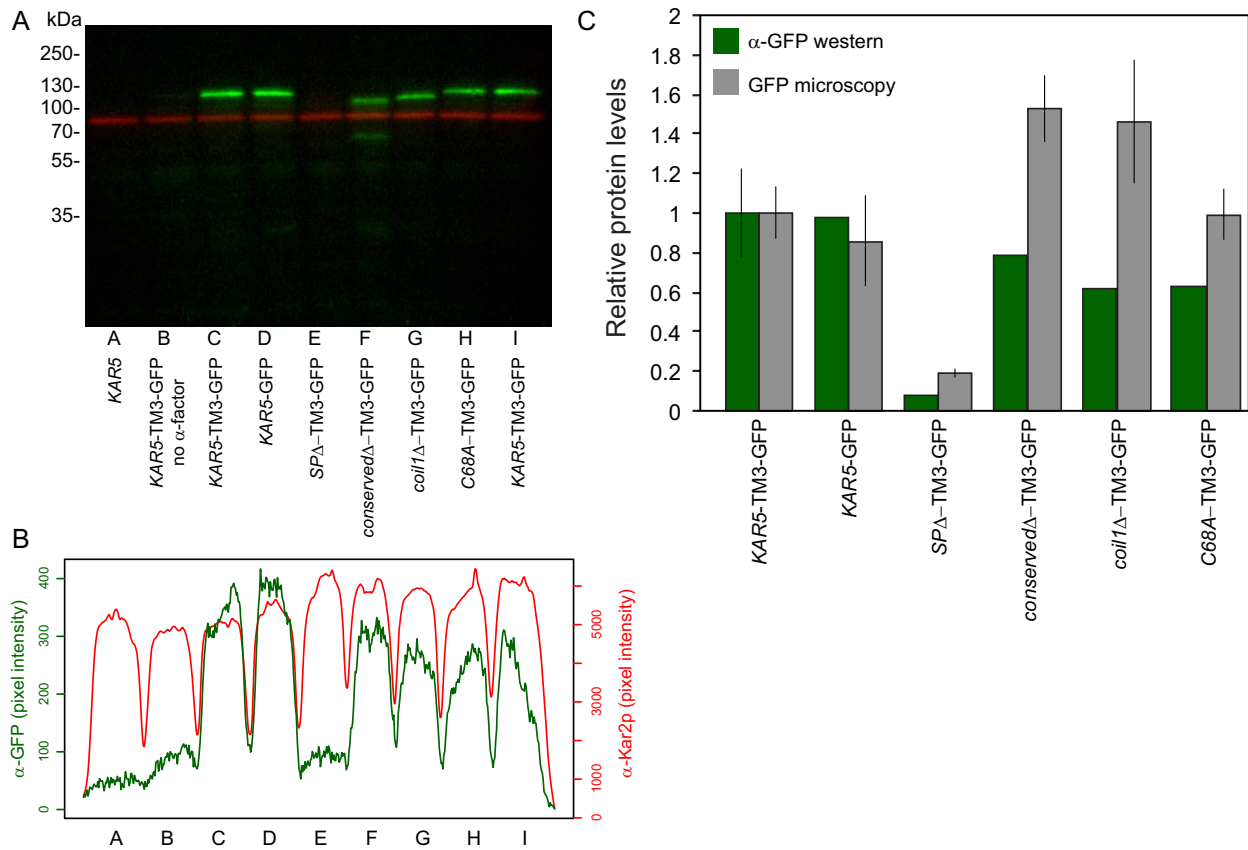

**Figure S4** Comparison of total Kar5-TM3-GFP protein in various *kar5* mutants by western blot. (A)  $\alpha$ -GFP (green; Clontech catalog # 632381) and  $\alpha$ -Kar2p (red, custom antibody) western blot for the indicated Kar5p-GFP proteins (same strains as in Figure 3). Protein was extracted using a standard TCA precipitation and electrophoresed on a standard 10% SDS-PAGE gel under denaturing and reducing conditions. The image shown is a merge of two separate exposures for different antibodies of the same nitrocellulose membrane. Lanes C and I are technical replicates of the same protein sample. (B). Profile plot of the image shown in A for a rectangle containing the region between ~55-130 kDa. (C) Protein quantification from B, normalized to lane C (Kar5-TM3-GFP), compared to total cellular GFP data from Figure 3D.

## Fraction GFP at SPB vs. Total Cellular GFP

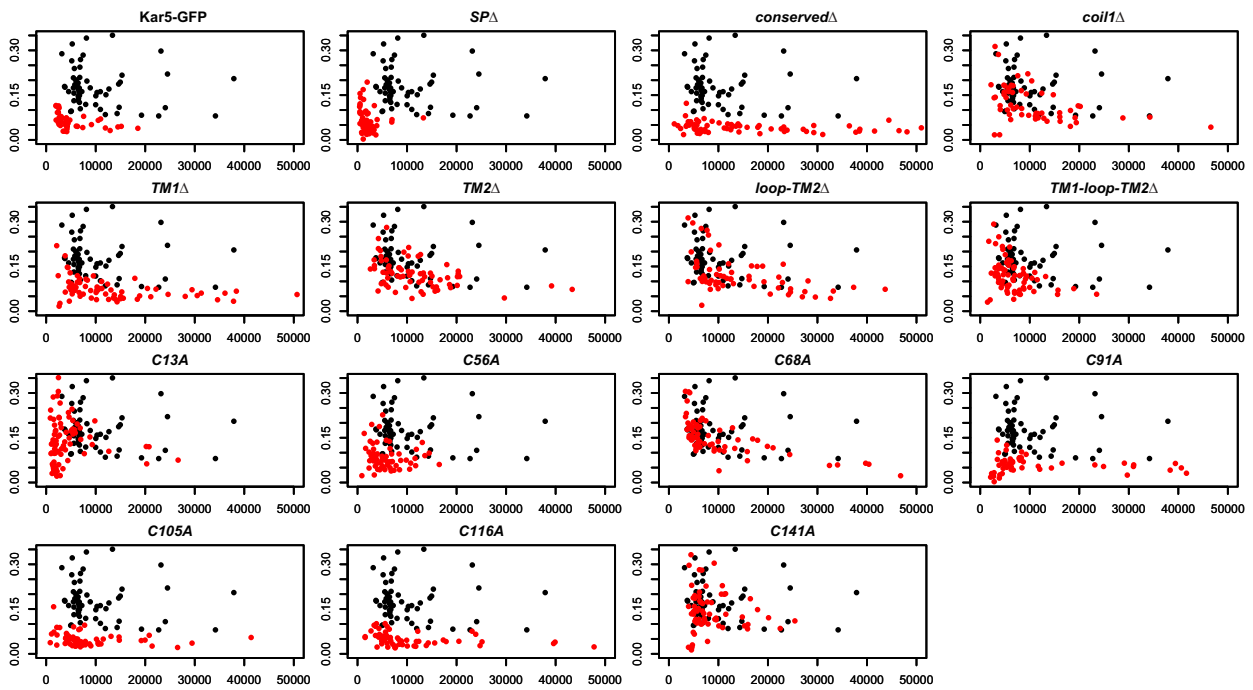

**Figure S5** Quantitative comparisons of *kar5* mutants. Each panel shows fraction GFP at the SPB (y-axis) vs. total cellular GFP (x-axis). Each point is a cell; black points are Kar5-TM3-GFP (constant in each panel), and red points are the mutant listed in the title for each panel. Data is identical to that shown in Figures 3D and 3E. A few points lying beyond the axes are not shown for clarity. From these plots, the expression and SPB enrichment ability relative to Kar5-TM3-GFP is easily visualized for each mutant. For example, the *C13A* mutant has less total GFP on average, but the fraction GFP at the SPB is similar. Conversely, the *conservedΔ* mutant has normal GFP expression levels, but the fraction at the SPB is consistently low.

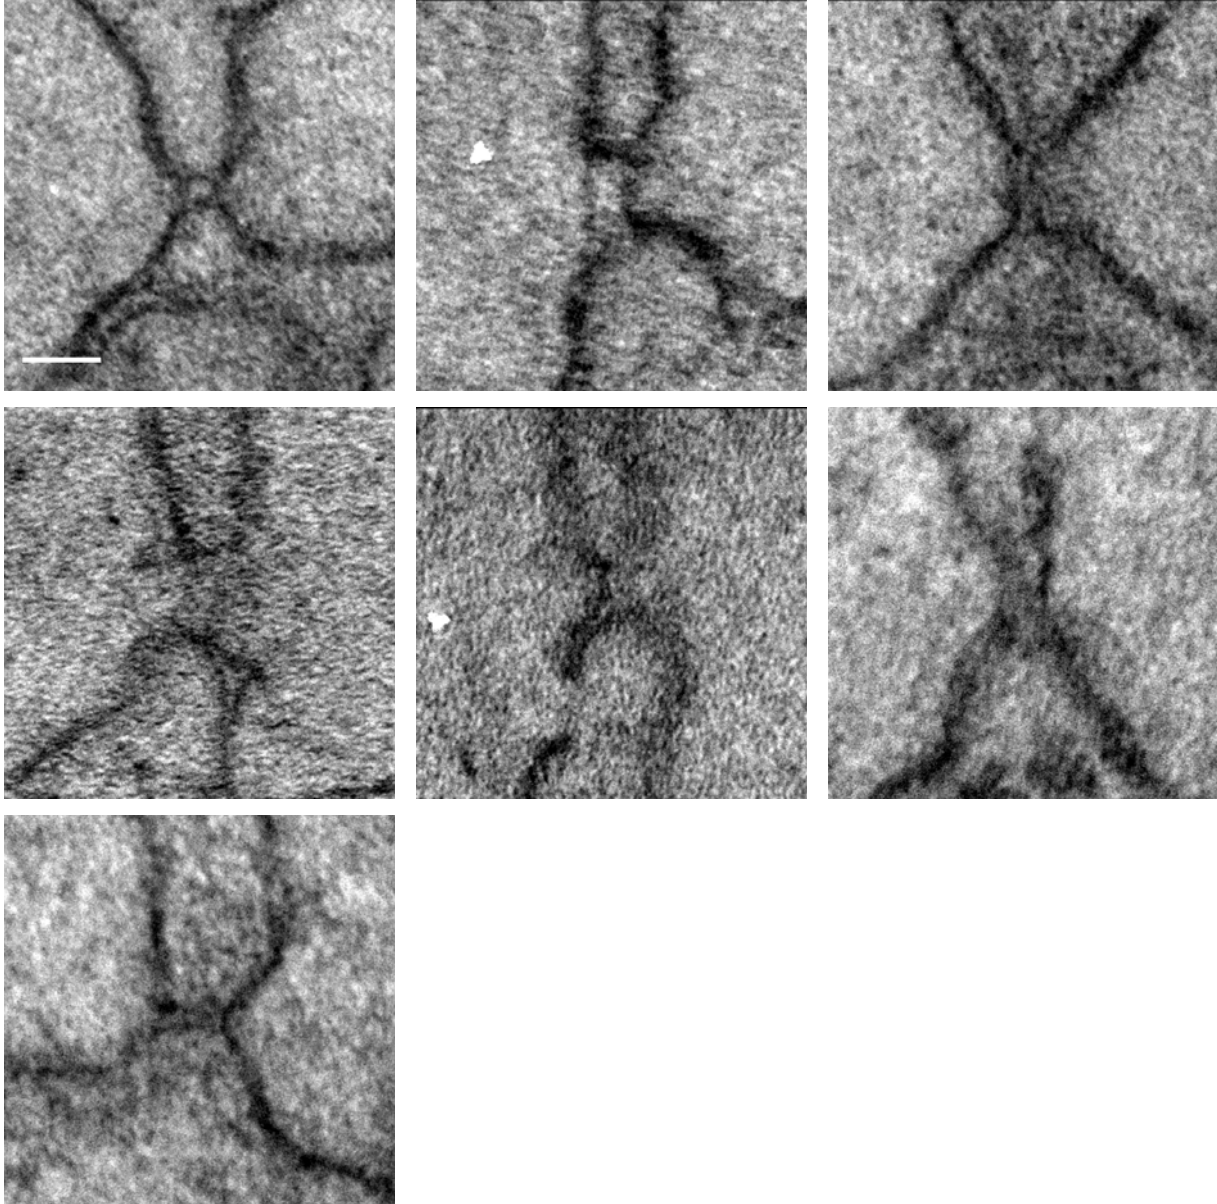

**Figure S6** Complete set of unambiguous *kar5-C68A* zygote membrane bridges. Images shown are from the same experiment discussed in Figure 6. Note that the first six bridges appear wide and expanded, whereas the final bridge is thin and long. Each image is a 500 x 500 nm area; scale bar is 100 nm.

**Table S1 Strains and plasmids used in this study**

| Strain  | Genotype                                                                                                          | Source               | Notes                                   |
|---------|-------------------------------------------------------------------------------------------------------------------|----------------------|-----------------------------------------|
| MS7590  | <i>MATa prm3Δ::HIS3 ura3-52 leu2-3,112 trp1Δ1 his3Δ200</i>                                                        | Rose Laboratory      |                                         |
| MS7591  | <i>MATa prm3Δ::HIS3 ura3-52 leu2-3,112 ade2-101 his3Δ200</i>                                                      | Rose Laboratory      |                                         |
| MS7670  | <i>MATa kar5Δ::HIS3 ura3-52 leu2-3,112 his3Δ200 trp1Δ1</i>                                                        | Rose Laboratory      |                                         |
| MS7673  | <i>MATa kar5Δ::HIS3 ura3-52 leu2-3,112 his3Δ200 trp1Δ1</i>                                                        | Rose Laboratory      |                                         |
| MS7729  | <i>MATa ura3-52 leu2-3,112 his3Δ200 trp1Δ1 ade2-101 SPC42::mRFP-KanMX</i>                                         | Rose Laboratory      |                                         |
| MS7884  | <i>MATa prm3Δ::HIS3 ura3-52 leu2-3,112 his3Δ200 trp1Δ1 ade2-101 SPC42::mRFP-KanMX</i>                             | Rose Laboratory      |                                         |
| MS8020  | <i>MATa kar5Δ::HIS3 ura3-52 leu2-3,112 his3Δ200 trp1Δ1 SPC42::mCherry-KanMX</i>                                   | This study           |                                         |
| MS8041  | <i>MATa kar2-1 ura3-52 leu2-3,112 trp1Δ1 SPC42::mCherry-KanMX</i>                                                 | This study           |                                         |
| MS8087  | <i>MATa kar8Δ::NatMX kar5Δ::HIS3 ura3-52 leu2-3,112 his3Δ200 trp1Δ1 SPC42::mCherry-KanMX</i>                      | This study           |                                         |
| MS8389  | <i>MATa kar5Δ::HIS3 ura3-52 leu2-3,112 his3Δ200 trp1Δ1 SPC42::mCherry-KanMX prm3Δ::NatMX [GFP-PRM3 LEU2 CEN4]</i> | This study           |                                         |
| MY7261  | <i>MATa his4- HOL1-1 ura3-52</i>                                                                                  | Rose Laboratory      |                                         |
| MY14348 | <i>MATa pom152Δ::HygMX ade2-1 his3-11,15 leu2-3,112 trp1Δ1 ura3Δ1 ade3Δ100</i>                                    | This study           |                                         |
| MY14349 | <i>MATa pom152Δ::HygMX ade2-1 his3-11,15 leu2-3,112 trp1Δ1 ura3Δ1</i>                                             | This study           | parent strain for all <i>pom152Δ</i>    |
| MY14355 | <i>MATa pom152Δ::HygMX mps3Δ::NatMX ade2-1 his3-11,15 leu2-3,112 trp1Δ1 ura3Δ1</i>                                | This study           | <i>mps3Δ</i> strains from Sue Jaspersen |
| MY14357 | <i>MATa pom152Δ::HygMX mps3Δ::NatMX ade2-1 his3-11,15 leu2-3,112 trp1Δ1 ura3Δ1</i>                                | This study           |                                         |
| MY14635 | <i>MATa pom152Δ::HygMX ade2-1 his3-11,15 leu2-3,112 trp1Δ1 ura3Δ1 ade3Δ100 SPC42::mCherry-KanMX</i>               | This study           |                                         |
| MY14637 | <i>MATa pom152Δ::HygMX mps3Δ::NatMX ade2-1 his3-11,15 leu2-3,112 trp1Δ1 ura3Δ1 SPC42::mCherry-KanMX</i>           | This study           |                                         |
| MY14667 | <i>MATa [GFP11-mCherry-PUS1-LEU2] trp- his- ura-</i>                                                              | Jaspersen Laboratory |                                         |
| MY14668 | <i>MATa [GFP11-mCherry-SCS2TM-LEU2] lys- trp- his- ura-</i>                                                       | Jaspersen Laboratory |                                         |
| Plasmid | Relevant markers                                                                                                  | Source               |                                         |
| pMR1868 | <i>URA3 CEN6 ARS4 amp-r</i>                                                                                       | Rose Laboratory      |                                         |
| pMR4518 | <i>KAR5 URA3 CEN6 ARS4 amp-r</i>                                                                                  | Rose Laboratory      |                                         |
| pMR6603 | <i>KAR5(C13A) URA3 CEN6 ARS4 amp-r</i>                                                                            | This study           |                                         |
| pMR6381 | <i>KAR5(C56A) URA3 CEN6 ARS4 amp-r</i>                                                                            | This study           |                                         |
| pMR6382 | <i>KAR5(C68A) URA3 CEN6 ARS4 amp-r</i>                                                                            | This study           |                                         |
| pMR6383 | <i>KAR5(C91A) URA3 CEN6 ARS4 amp-r</i>                                                                            | This study           |                                         |
| pMR6604 | <i>KAR5(C105A) URA3 CEN6 ARS4 amp-r</i>                                                                           | This study           |                                         |
| pMR6605 | <i>KAR5(C116A) URA3 CEN6 ARS4 amp-r</i>                                                                           | This study           |                                         |
| pMR6606 | <i>KAR5(C141A) URA3 CEN6 ARS4 amp-r</i>                                                                           | This study           |                                         |
| pMR6384 | <i>KAR5(C444A) URA3 CEN6 ARS4 amp-r</i>                                                                           | This study           |                                         |
| pMR6607 | <i>KAR5(C458A) URA3 CEN6 ARS4 amp-r</i>                                                                           | This study           |                                         |
| pMR6608 | <i>KAR5(Δ4-23) URA3 CEN6 ARS4 amp-r (SPΔ)</i>                                                                     | This study           |                                         |
| pMR6385 | <i>KAR5(Δ186-215) URA3 CEN6 ARS4 amp-r (coil1Δ)</i>                                                               | This study           |                                         |
| pMR6386 | <i>KAR5(Δ401-436) URA3 CEN6 ARS4 amp-r (coil2Δ)</i>                                                               | This study           |                                         |
| pMR6609 | <i>KAR5(Δ445-465) URA3 CEN6 ARS4 amp-r (TM1Δ)</i>                                                                 | This study           |                                         |



|         |                                                                        |                 |
|---------|------------------------------------------------------------------------|-----------------|
| pMR6387 | <i>KAR5(Δ481-504) URA3 CEN6 ARS4 amp-r (TM2Δ)</i>                      | This study      |
| pMR6751 | <i>KAR5(Δ466-504) URA3 CEN6 ARS4 amp-r (loop-TM2Δ)</i>                 | This study      |
| pMR6610 | <i>KAR5(Δ445-504) URA3 CEN6 ARS4 amp-r (TM1-loop-TM2Δ)</i>             | This study      |
| pMR6611 | <i>KAR5(Δ116-167) URA3 CEN6 ARS4 amp-r (conserved regionΔ)</i>         | This study      |
| pMR6366 | <i>KAR5:GFP URA3 CEN6 ARS4 amp-r</i>                                   | This study      |
| pMR6364 | <i>KAR5:TM3:GFP URA3 CEN6 ARS4 amp-r</i>                               | This study      |
| pMR6612 | <i>KAR5(C13A):TM3:GFP URA3 CEN6 ARS4 amp-r</i>                         | This study      |
| pMR6749 | <i>KAR5(C56A):TM3:GFP URA3 CEN6 ARS4 amp-r</i>                         | This study      |
| pMR6750 | <i>KAR5(C68A):TM3:GFP URA3 CEN6 ARS4 amp-r</i>                         | This study      |
| pMR6615 | <i>KAR5(C91A):TM3:GFP URA3 CEN6 ARS4 amp-r</i>                         | This study      |
| pMR6616 | <i>KAR5(C105A):TM3:GFP URA3 CEN6 ARS4 amp-r</i>                        | This study      |
| pMR6617 | <i>KAR5(C116A):TM3:GFP URA3 CEN6 ARS4 amp-r</i>                        | This study      |
| pMR6618 | <i>KAR5(C141A):TM3:GFP URA3 CEN6 ARS4 amp-r</i>                        | This study      |
| pMR6619 | <i>KAR5(Δ4-23):TM3:GFP URA3 CEN6 ARS4 amp-r (SPΔ)</i>                  | This study      |
| pMR6620 | <i>KAR5(Δ186-215):TM3:GFP URA3 CEN6 ARS4 amp-r (coil1Δ)</i>            | This study      |
| pMR6622 | <i>KAR5(Δ116-167):TM3:GFP URA3 CEN6 ARS4 amp-r (conserved regionΔ)</i> | This study      |
| pMR6627 | <i>KAR5(Δ445-465):GFP URA3 CEN6 ARS4 amp-r (TM1Δ)</i>                  | This study      |
| pMR6748 | <i>KAR5(Δ481-504):GFP URA3 CEN6 ARS4 amp-r (TM2Δ)</i>                  | This study      |
| pMR6629 | <i>KAR5(Δ466-504):GFP URA3 CEN6 ARS4 amp-r (loop-TM2Δ)</i>             | This study      |
| pMR6744 | <i>KAR5(Δ445-504):GFP URA3 CEN6 ARS4 amp-r (TM1-loop-TM2Δ)</i>         | This study      |
| pMR6082 | <i>pADH1-KAR5:HIS4C URA3 2μ amp-r</i>                                  | This study      |
| pMR6081 | <i>pADH1-KAR5:TM3:HIS4C URA3 2μ amp-r</i>                              | This study      |
| pMR6083 | <i>pADH1-KAR5(TM2Δ):HIS4C URA3 2μ amp-r</i>                            | This study      |
| pMR6085 | <i>pADH1-SEC63:HIS4C URA3 2μ amp-r</i>                                 | This study      |
| pMR1872 | <i>URA3 2μ amp-r</i>                                                   | Rose Laboratory |
| pMR6371 | <i>pADH1-KAR5:TM3:GFP URA3 CEN6 ARS4 amp-r</i>                         | This study      |
| pMR6433 | <i>pADH1-mCherry:PRM3 LEU2 CEN6 ARS4 amp-r</i>                         | This study      |
| pMR6907 | <i>pADH1-GFP1-10 URA3 CEN6 ARS4 amp-r</i>                              | This study      |
| pMR6945 | <i>pSEY1-SEY1-GFP1-10 URA3 CEN6 ARS4 amp-r</i>                         | This study      |
| pMR6932 | <i>pKAR5-KAR5:TM3:GFP1-10 URA3 CEN6 ARS4 amp-r</i>                     | This study      |

**Table S2 Raw p-values associated with Table 1 (two-sided t-test)**

Available for download as an Excel file at <http://www.g3journal.org/lookup/suppl/doi:10.1534/g3.114.015800/-/DC1>
