# Supplementary material for: Kar5p Is Required for Multiple Functions in Both Inner and Outer Nuclear Envelope Fusion in Saccharomyces cerevisiae
Source: PubMed Central journal article supplement (PMC4291462; doi:10.1534/g3.114.015800), 2014-12-02
Supplement: supp_g3.114.015800_FigureS3.pdf [file supp_g3.114.015800_FigureS3.pdf]

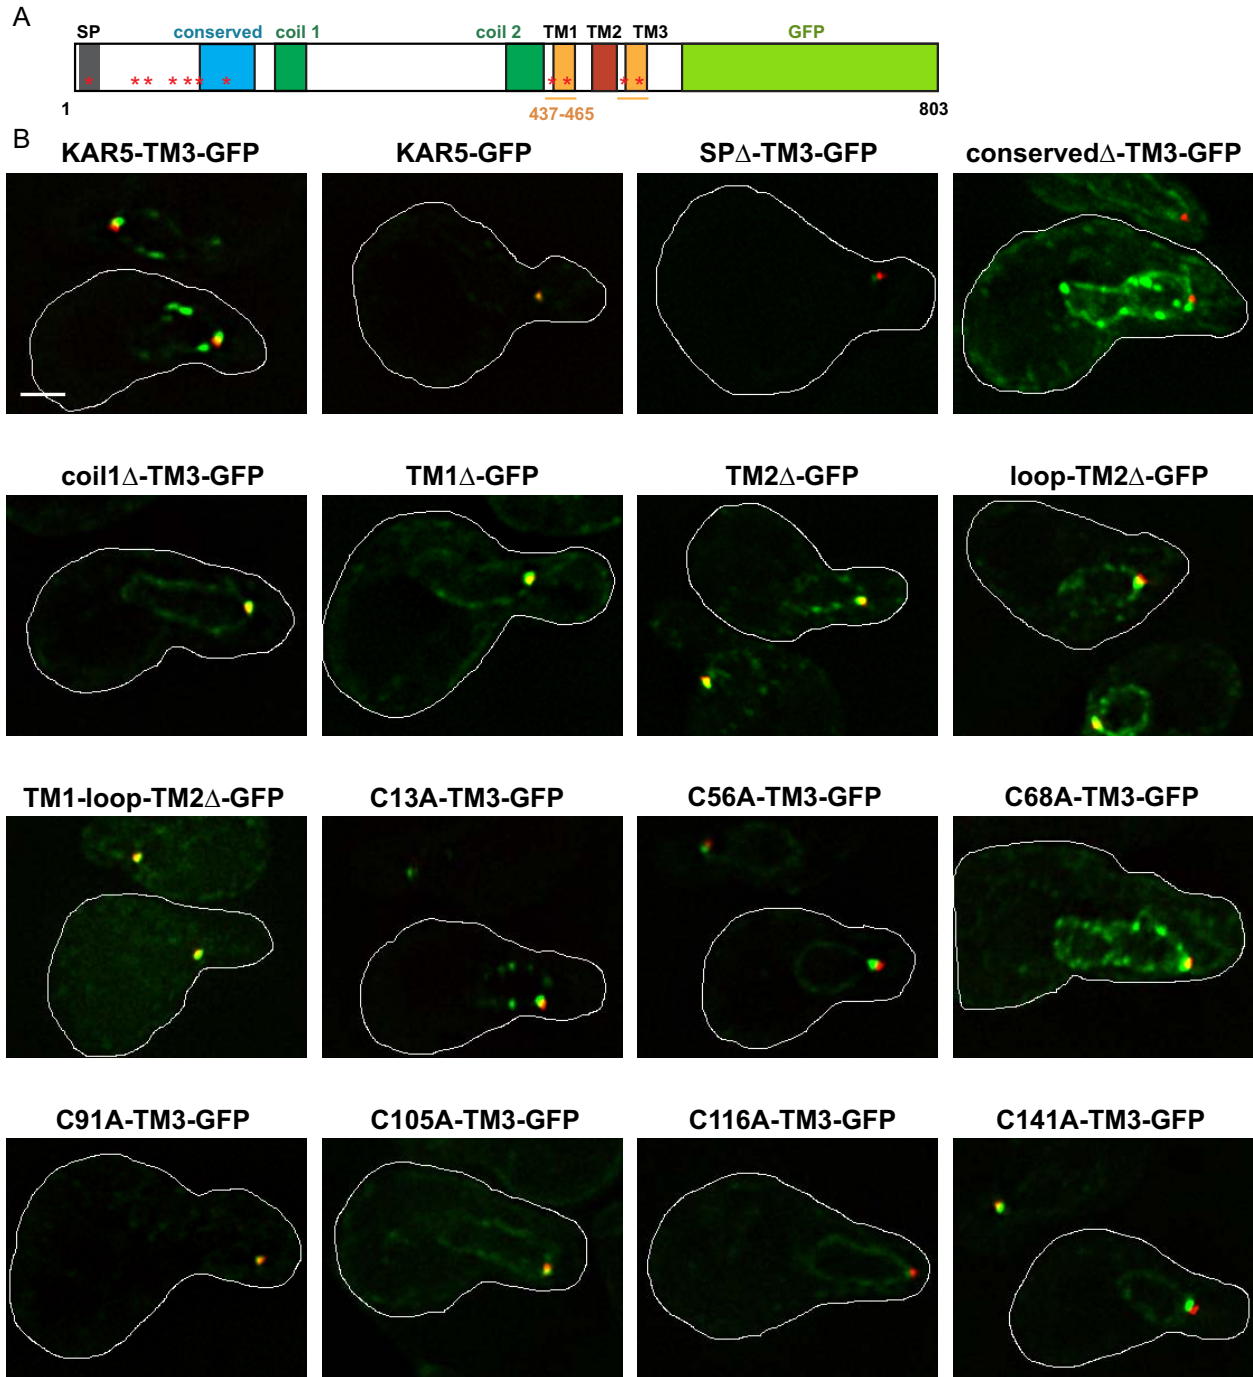

**Figure S3** Representative GFP images of *kar5* mutants from Figure 3. (A) Schematic of Kar5-TM3-GFP as in Figure 3A. (B) Representative images showing a merge of GFP, Spc42-mCherry, and a cell outline. As in Figure 3, strains used are MS8020 plus the indicated CEN plasmid. All images are the same size and scaled to the same brightness/contrast. Scale bar, 2  $\mu$ m.
