# Supplementary material for: Kar5p Is Required for Multiple Functions in Both Inner and Outer Nuclear Envelope Fusion in Saccharomyces cerevisiae
Source: PubMed Central journal article supplement (PMC4291462; doi:10.1534/g3.114.015800), 2014-12-02
Supplement: supp_g3.114.015800_TableS1.pdf [file supp_g3.114.015800_TableS1.pdf]

**Table S1 Strains and plasmids used in this study**

| Strain  | Genotype                                                                                                          | Source               | Notes                                   |
|---------|-------------------------------------------------------------------------------------------------------------------|----------------------|-----------------------------------------|
| MS7590  | <i>MATa prm3Δ::HIS3 ura3-52 leu2-3,112 trp1Δ1 his3Δ200</i>                                                        | Rose Laboratory      |                                         |
| MS7591  | <i>MATa prm3Δ::HIS3 ura3-52 leu2-3,112 ade2-101 his3Δ200</i>                                                      | Rose Laboratory      |                                         |
| MS7670  | <i>MATa kar5Δ::HIS3 ura3-52 leu2-3,112 his3Δ200 trp1Δ1</i>                                                        | Rose Laboratory      |                                         |
| MS7673  | <i>MATa kar5Δ::HIS3 ura3-52 leu2-3,112 his3Δ200 trp1Δ1</i>                                                        | Rose Laboratory      |                                         |
| MS7729  | <i>MATa ura3-52 leu2-3,112 his3Δ200 trp1Δ1 ade2-101 SPC42::mRFP-KanMX</i>                                         | Rose Laboratory      |                                         |
| MS7884  | <i>MATa prm3Δ::HIS3 ura3-52 leu2-3,112 his3Δ200 trp1Δ1 ade2-101 SPC42::mRFP-KanMX</i>                             | Rose Laboratory      |                                         |
| MS8020  | <i>MATa kar5Δ::HIS3 ura3-52 leu2-3,112 his3Δ200 trp1Δ1 SPC42::mCherry-KanMX</i>                                   | This study           |                                         |
| MS8041  | <i>MATa kar2-1 ura3-52 leu2-3,112 trp1Δ1 SPC42::mCherry-KanMX</i>                                                 | This study           |                                         |
| MS8087  | <i>MATa kar8Δ::NatMX kar5Δ::HIS3 ura3-52 leu2-3,112 his3Δ200 trp1Δ1 SPC42::mCherry-KanMX</i>                      | This study           |                                         |
| MS8389  | <i>MATa kar5Δ::HIS3 ura3-52 leu2-3,112 his3Δ200 trp1Δ1 SPC42::mCherry-KanMX prm3Δ::NatMX [GFP-PRM3 LEU2 CEN4]</i> | This study           |                                         |
| MY7261  | <i>MATa his4- HOL1-1 ura3-52</i>                                                                                  | Rose Laboratory      |                                         |
| MY14348 | <i>MATa pom152Δ::HygMX ade2-1 his3-11,15 leu2-3,112 trp1Δ1 ura3Δ1 ade3Δ100</i>                                    | This study           |                                         |
| MY14349 | <i>MATa pom152Δ::HygMX ade2-1 his3-11,15 leu2-3,112 trp1Δ1 ura3Δ1</i>                                             | This study           | parent strain for all <i>pom152Δ</i>    |
| MY14355 | <i>MATa pom152Δ::HygMX mps3Δ::NatMX ade2-1 his3-11,15 leu2-3,112 trp1Δ1 ura3Δ1</i>                                | This study           | <i>mps3Δ</i> strains from Sue Jaspersen |
| MY14357 | <i>MATa pom152Δ::HygMX mps3Δ::NatMX ade2-1 his3-11,15 leu2-3,112 trp1Δ1 ura3Δ1</i>                                | This study           |                                         |
| MY14635 | <i>MATa pom152Δ::HygMX ade2-1 his3-11,15 leu2-3,112 trp1Δ1 ura3Δ1 ade3Δ100 SPC42::mCherry-KanMX</i>               | This study           |                                         |
| MY14637 | <i>MATa pom152Δ::HygMX mps3Δ::NatMX ade2-1 his3-11,15 leu2-3,112 trp1Δ1 ura3Δ1 SPC42::mCherry-KanMX</i>           | This study           |                                         |
| MY14667 | <i>MATa [GFP11-mCherry-PUS1-LEU2] trp- his- ura-</i>                                                              | Jaspersen Laboratory |                                         |
| MY14668 | <i>MATa [GFP11-mCherry-SCS2TM-LEU2] lys- trp- his- ura-</i>                                                       | Jaspersen Laboratory |                                         |
| Plasmid | Relevant markers                                                                                                  | Source               |                                         |
| pMR1868 | <i>URA3 CEN6 ARS4 amp-r</i>                                                                                       | Rose Laboratory      |                                         |
| pMR4518 | <i>KAR5 URA3 CEN6 ARS4 amp-r</i>                                                                                  | Rose Laboratory      |                                         |
| pMR6603 | <i>KAR5(C13A) URA3 CEN6 ARS4 amp-r</i>                                                                            | This study           |                                         |
| pMR6381 | <i>KAR5(C56A) URA3 CEN6 ARS4 amp-r</i>                                                                            | This study           |                                         |
| pMR6382 | <i>KAR5(C68A) URA3 CEN6 ARS4 amp-r</i>                                                                            | This study           |                                         |
| pMR6383 | <i>KAR5(C91A) URA3 CEN6 ARS4 amp-r</i>                                                                            | This study           |                                         |
| pMR6604 | <i>KAR5(C105A) URA3 CEN6 ARS4 amp-r</i>                                                                           | This study           |                                         |
| pMR6605 | <i>KAR5(C116A) URA3 CEN6 ARS4 amp-r</i>                                                                           | This study           |                                         |
| pMR6606 | <i>KAR5(C141A) URA3 CEN6 ARS4 amp-r</i>                                                                           | This study           |                                         |
| pMR6384 | <i>KAR5(C444A) URA3 CEN6 ARS4 amp-r</i>                                                                           | This study           |                                         |
| pMR6607 | <i>KAR5(C458A) URA3 CEN6 ARS4 amp-r</i>                                                                           | This study           |                                         |
| pMR6608 | <i>KAR5(Δ4-23) URA3 CEN6 ARS4 amp-r (SPΔ)</i>                                                                     | This study           |                                         |
| pMR6385 | <i>KAR5(Δ186-215) URA3 CEN6 ARS4 amp-r (coil1Δ)</i>                                                               | This study           |                                         |
| pMR6386 | <i>KAR5(Δ401-436) URA3 CEN6 ARS4 amp-r (coil2Δ)</i>                                                               | This study           |                                         |
| pMR6609 | <i>KAR5(Δ445-465) URA3 CEN6 ARS4 amp-r (TM1Δ)</i>                                                                 | This study           |                                         |

|         |                                                                        |                 |
|---------|------------------------------------------------------------------------|-----------------|
| pMR6387 | <i>KAR5(Δ481-504) URA3 CEN6 ARS4 amp-r (TM2Δ)</i>                      | This study      |
| pMR6751 | <i>KAR5(Δ466-504) URA3 CEN6 ARS4 amp-r (loop-TM2Δ)</i>                 | This study      |
| pMR6610 | <i>KAR5(Δ445-504) URA3 CEN6 ARS4 amp-r (TM1-loop-TM2Δ)</i>             | This study      |
| pMR6611 | <i>KAR5(Δ116-167) URA3 CEN6 ARS4 amp-r (conserved regionΔ)</i>         | This study      |
| pMR6366 | <i>KAR5:GFP URA3 CEN6 ARS4 amp-r</i>                                   | This study      |
| pMR6364 | <i>KAR5:TM3:GFP URA3 CEN6 ARS4 amp-r</i>                               | This study      |
| pMR6612 | <i>KAR5(C13A):TM3:GFP URA3 CEN6 ARS4 amp-r</i>                         | This study      |
| pMR6749 | <i>KAR5(C56A):TM3:GFP URA3 CEN6 ARS4 amp-r</i>                         | This study      |
| pMR6750 | <i>KAR5(C68A):TM3:GFP URA3 CEN6 ARS4 amp-r</i>                         | This study      |
| pMR6615 | <i>KAR5(C91A):TM3:GFP URA3 CEN6 ARS4 amp-r</i>                         | This study      |
| pMR6616 | <i>KAR5(C105A):TM3:GFP URA3 CEN6 ARS4 amp-r</i>                        | This study      |
| pMR6617 | <i>KAR5(C116A):TM3:GFP URA3 CEN6 ARS4 amp-r</i>                        | This study      |
| pMR6618 | <i>KAR5(C141A):TM3:GFP URA3 CEN6 ARS4 amp-r</i>                        | This study      |
| pMR6619 | <i>KAR5(Δ4-23):TM3:GFP URA3 CEN6 ARS4 amp-r (SPΔ)</i>                  | This study      |
| pMR6620 | <i>KAR5(Δ186-215):TM3:GFP URA3 CEN6 ARS4 amp-r (coil1Δ)</i>            | This study      |
| pMR6622 | <i>KAR5(Δ116-167):TM3:GFP URA3 CEN6 ARS4 amp-r (conserved regionΔ)</i> | This study      |
| pMR6627 | <i>KAR5(Δ445-465):GFP URA3 CEN6 ARS4 amp-r (TM1Δ)</i>                  | This study      |
| pMR6748 | <i>KAR5(Δ481-504):GFP URA3 CEN6 ARS4 amp-r (TM2Δ)</i>                  | This study      |
| pMR6629 | <i>KAR5(Δ466-504):GFP URA3 CEN6 ARS4 amp-r (loop-TM2Δ)</i>             | This study      |
| pMR6744 | <i>KAR5(Δ445-504):GFP URA3 CEN6 ARS4 amp-r (TM1-loop-TM2Δ)</i>         | This study      |
| pMR6082 | <i>pADH1-KAR5:HIS4C URA3 2μ amp-r</i>                                  | This study      |
| pMR6081 | <i>pADH1-KAR5:TM3:HIS4C URA3 2μ amp-r</i>                              | This study      |
| pMR6083 | <i>pADH1-KAR5(TM2Δ):HIS4C URA3 2μ amp-r</i>                            | This study      |
| pMR6085 | <i>pADH1-SEC63:HIS4C URA3 2μ amp-r</i>                                 | This study      |
| pMR1872 | <i>URA3 2μ amp-r</i>                                                   | Rose Laboratory |
| pMR6371 | <i>pADH1-KAR5:TM3:GFP URA3 CEN6 ARS4 amp-r</i>                         | This study      |
| pMR6433 | <i>pADH1-mCherry:PRM3 LEU2 CEN6 ARS4 amp-r</i>                         | This study      |
| pMR6907 | <i>pADH1-GFP1-10 URA3 CEN6 ARS4 amp-r</i>                              | This study      |
| pMR6945 | <i>pSEY1-SEY1-GFP1-10 URA3 CEN6 ARS4 amp-r</i>                         | This study      |
| pMR6932 | <i>pKAR5-KAR5:TM3:GFP1-10 URA3 CEN6 ARS4 amp-r</i>                     | This study      |

**Table S2 Raw p-values associated with Table 1 (two-sided t-test)**

Available for download as an Excel file at <http://www.g3journal.org/lookup/suppl/doi:10.1534/g3.114.015800/-/DC1>
